# Supplementary material for: Study of the Association between VEGF Polymorphisms and the Risk of Coronary Artery Disease in Koreans
Source: MDPI journal article supplement (doi:10.3390/jpm12050761), 2022-05-07
Supplement: s1 [file s1]

Table S1. Information of *VEGF* polymorphisms primer set for PCP-RFLP, real-time PCR

| Method               | Genotype             | Reference SNP ID | Primer sequence                                                                                                                                                                                                           | Annealing condition  | Restriction enzyme | RFLP condition              |
|----------------------|----------------------|------------------|---------------------------------------------------------------------------------------------------------------------------------------------------------------------------------------------------------------------------|----------------------|--------------------|-----------------------------|
| PCR-RFLP             | <i>VEGF</i> +936C>T  | rs1570360        | Forward: 5'- CGC GTG TCT CTG GAC AGA GTT TCC -3'<br>Reverse: 5'- CGG GGA CAG GCG AGC TTC AG -3'                                                                                                                           | 59°C, with 35 cycles | <i>Mnl</i> I       | incubation for 16hr at 37°C |
|                      | <i>VEGF</i> +936C>T  | rs3025039        | Forward: 5'- AAG GAA GAG GAG ACT CTG CGC AGA GC -3'<br>Reverse: 5'- TAA ATG TAT GTA TGT GGG TGG GTG TGT CTA CAG G -3'                                                                                                     | 68°C, with 35 cycles | <i>Nla</i> III     | incubation for 16hr at 37°C |
| Taqman real-time PCR | <i>VEGF</i> +1451C>T | rs3025040        | Forward: 5'- ACG GAC AGA AAG ACA GAT CAC AG -3'<br>Reverse: 5'- CCC AAA GCA CAG CAA TGT C -3'<br>C probe: 5'- [FAM]-TGA GGA CAC C GGC TCT GAC C-[TAMRA] -3'<br>T probe: 5'- [JOE]-TGA GGA CAC T GGC TCT GAC C-[TAMRA] -3' | 57°C, with 50 cycles |                    |                             |
|                      | <i>VEGF</i> +1612G>A | rs10434          | Forward: 5'- TTC GCT TAC TCT CAC CTG CTT C -3'<br>Reverse: 5'- GCT GTC ATG GGC TGC TTC T -3'<br>G probe: 5'- [FAM]-CCC AGG AG G CCA CTG GCA-[TAMRA] -3'<br>A probe: 5'- [[JOE]-CCC AGG AG A CCA CTG GCA-[TAMRA] -3'       | 65°C, with 50 Cycles |                    |                             |
|                      | <i>VEGF</i> +1725G>A | rs3025053        | Forward: 5'- CAT GAC AGC TCC CCT TCC T -3'<br>Reverse: 5'- TGG TTT CAA TGG TGT GAG GAC -3'<br>G probe: 5'- [FAM]-CTT CCT GGG G TGC AGC CTA A-[TAMRA] -3'<br>A probe: 5'- [JOE]-CTT CCT GGG A TGC AGC CTA A-[TAMRA] -3'    | 68°C, with 35 cycles |                    |                             |
|                      |                      |                  |                                                                                                                                                                                                                           |                      |                    |                             |

PCR, polymerase chain reaction, RFLP, restriction fragment length polymorphism

Table S2. Comparison of allele frequency in recruited samples and variable population of 1000 genomes.

| SNP       | Allele | Control | CAD   | EAS   | CDX   | CHB   | CHS   | JPT   | KHV   |
|-----------|--------|---------|-------|-------|-------|-------|-------|-------|-------|
| rs1570360 | A      | 0.838   | 0.855 | 0.184 | 0.167 | 0.175 | 0.176 | 0.168 | 0.232 |
|           | G      | 0.162   | 0.145 | 0.816 | 0.833 | 0.825 | 0.824 | 0.832 | 0.768 |
| rs833061  | T      | 0.758   | 0.766 | 0.717 | 0.763 | 0.728 | 0.733 | 0.663 | 0.702 |
|           | C      | 0.242   | 0.234 | 0.283 | 0.237 | 0.272 | 0.267 | 0.337 | 0.298 |
| rs3025039 | C      | 0.803   | 0.820 | 0.830 | 0.866 | 0.816 | 0.790 | 0.841 | 0.843 |
|           | T      | 0.197   | 0.180 | 0.827 | 0.849 | 0.816 | 0.790 | 0.841 | 0.843 |
| rs3025040 | C      | 0.812   | 0.824 | 0.170 | 0.134 | 0.184 | 0.210 | 0.159 | 0.157 |
|           | T      | 0.188   | 0.176 | 0.173 | 0.151 | 0.184 | 0.210 | 0.159 | 0.157 |
| rs10434   | G      | 0.841   | 0.826 | 0.780 | 0.672 | 0.791 | 0.800 | 0.865 | 0.758 |
|           | A      | 0.159   | 0.174 | 0.220 | 0.328 | 0.209 | 0.200 | 0.135 | 0.242 |
| rs3025053 | G      | 0.947   | 0.932 | 0.864 | 0.758 | 0.913 | 0.862 | 0.962 | 0.813 |
|           | A      | 0.053   | 0.068 | 0.136 | 0.242 | 0.087 | 0.138 | 0.038 | 0.187 |

EAS, east Asian; CDX, Chinese Dai in Xishuangbanna, China; CHB, Han Chinese in Beijing, China; CHS, Southern Han Chinese; JPT, Japanese in Tokyo, Japan; KHV, Kinh in Ho Chi Minh City, Vietnam

Table S3. Comparison of genotype frequencies of *VEGF* polymorphisms according to gender.

| Genotype                   | Male<br>control subjects<br>(n=172) | Male<br>CAD patients<br>(n=201) | AOR (95% CI)         | <i>P</i> | FDR- <i>P</i> | Female<br>control subjects<br>(n=250) | Female<br>CAD patients<br>(n=262) | AOR (95% CI)        | <i>P</i> | FDR- <i>P</i> |
|----------------------------|-------------------------------------|---------------------------------|----------------------|----------|---------------|---------------------------------------|-----------------------------------|---------------------|----------|---------------|
| <i>VEGF</i> -1154G>A       |                                     |                                 |                      |          |               |                                       |                                   |                     |          |               |
| GG                         | 118 (68.6)                          | 145 (72.1)                      | 1.000 (reference)    |          |               | 175 (70.0)                            | 195 (74.4)                        | 1.000 (reference)   |          |               |
| GA                         | 49 (28.5)                           | 50 (24.9)                       | 0.895 (0.555-1.442)  | 0.648    | 0.972         | 72 (28.8)                             | 62 (23.7)                         | 0.787 (0.517-1.195) | 0.261    | 0.392         |
| AA                         | 5 (2.9)                             | 6 (3.0)                         | 0.744 (0.202-2.736)  | 0.656    | 0.811         | 3 (1.2)                               | 5 (1.9)                           | 1.563 (0.336-7.270) | 0.569    | 0.711         |
| Dominant (GG vs. GA + AA)  |                                     |                                 | 0.883 (0.557-1.400)  | 0.597    | 0.896         |                                       |                                   | 0.815 (0.541-1.229) | 0.330    | 0.480         |
| Recessive (GG + GA vs. AA) |                                     |                                 | 0.759 (0.206-2.796)  | 0.678    | 0.876         |                                       |                                   | 1.637 (0.356-7.516) | 0.526    | 0.658         |
| HWE- <i>P</i>              | 0.974                               | 0.51                            |                      |          |               | 0.138                                 | 0.978                             |                     |          |               |
| <i>VEGF</i> -1498T>C       |                                     |                                 |                      |          |               |                                       |                                   |                     |          |               |
| TT                         | 87 (50.6)                           | 117 (58.2)                      | 1.000 (reference)    |          |               | 154 (61.6)                            | 150 (57.3)                        | 1.000 (reference)   |          |               |
| TC                         | 76 (44.2)                           | 75 (37.3)                       | 0.716 (0.463-1.100)  | 0.133    | 0.549         | 82 (32.8)                             | 100 (38.2)                        | 1.172 (0.792-1.735) | 0.427    | 0.512         |
| CC                         | 9 (5.2)                             | 9 (4.5)                         | 0.547 (0.190-1.578)  | 0.265    | 0.663         | 14 (5.6)                              | 12 (4.6)                          | 0.966 (0.410-2.278) | 0.937    | 0.937         |
| Dominant (TT vs. TC + CC)  |                                     |                                 | 0.702 (0.460-1.071)  | 0.100    | 0.546         |                                       |                                   | 1.145 (0.786-1.669) | 0.480    | 0.480         |
| Recessive (TT + TC vs. CC) |                                     |                                 | 0.662 (0.240-1.825)  | 0.425    | 0.876         |                                       |                                   | 0.918 (0.393-2.143) | 0.843    | 0.843         |
| HWE- <i>P</i>              | 0.140                               | 0.486                           |                      |          |               | 0.484                                 | 0.361                             |                     |          |               |
| <i>VEGF</i> +936C>T        |                                     |                                 |                      |          |               |                                       |                                   |                     |          |               |
| CC                         | 119 (69.2)                          | 129 (64.2)                      | 1.000 (reference)    |          |               | 154 (61.6)                            | 182 (69.5)                        | 1.000 (reference)   |          |               |
| CT                         | 51 (29.7)                           | 65 (32.3)                       | 1.145 (0.725-1.808)  | 0.561    | 0.972         | 81 (32.4)                             | 72 (27.5)                         | 0.638 (0.423-0.963) | 0.032    | 0.159         |
| TT                         | 2 (1.2)                             | 7 (3.5)                         | 3.263 (0.611-17.426) | 0.167    | 0.663         | 15 (6.0)                              | 8 (3.1)                           | 0.374 (0.141-0.987) | 0.047    | 0.108         |
| Dominant (CC vs. CT + TT)  |                                     |                                 | 1.224 (0.784-1.910)  | 0.375    | 0.750         |                                       |                                   | 0.593 (0.399-0.881) | 0.010    | 0.054         |
| Recessive (CC + CT vs. TT) |                                     |                                 | 3.240 (0.626-16.781) | 0.161    | 0.805         |                                       |                                   | 0.431 (0.166-1.122) | 0.085    | 0.172         |
| HWE- <i>P</i>              | 0.174                               | 0.733                           |                      |          |               | 0.327                                 | 0.787                             |                     |          |               |
| <i>VEGF</i> +1451C>T       |                                     |                                 |                      |          |               |                                       |                                   |                     |          |               |
| CC                         | 123 (71.5)                          | 131 (65.2)                      | 1.000 (reference)    |          |               | 160 (64.0)                            | 184 (70.2)                        | 1.000 (reference)   |          |               |
| CT                         | 43 (25.0)                           | 63 (31.3)                       | 1.378 (0.859-2.209)  | 0.183    | 0.549         | 76 (30.4)                             | 70 (26.7)                         | 0.662 (0.436-1.005) | 0.053    | 0.159         |
| TT                         | 6 (3.5)                             | 7 (3.5)                         | 1.158 (0.348-3.854)  | 0.811    | 0.811         | 14 (5.6)                              | 8 (3.1)                           | 0.396 (0.148-1.060) | 0.065    | 0.108         |
| Dominant (CC vs. CT + TT)  |                                     |                                 | 1.362 (0.866-2.142)  | 0.182    | 0.546         |                                       |                                   | 0.617 (0.413-0.922) | 0.018    | 0.054         |
| Recessive (CC + CT vs. TT) |                                     |                                 | 1.098 (0.338-3.567)  | 0.876    | 0.876         |                                       |                                   | 0.448 (0.171-1.177) | 0.103    | 0.172         |
| HWE- <i>P</i>              | 0.363                               | 0.865                           |                      |          |               | 0.222                                 | 0.671                             |                     |          |               |
| <i>VEGF</i> +1612G>A       |                                     |                                 |                      |          |               |                                       |                                   |                     |          |               |
| GG                         | 119 (69.2)                          | 140 (69.7)                      | 1.000 (reference)    |          |               | 179 (71.6)                            | 180 (68.7)                        | 1.000 (reference)   |          |               |
| GA                         | 48 (27.9)                           | 54 (26.9)                       | 0.973 (0.606-1.563)  | 0.911    | 0.972         | 66 (26.4)                             | 71 (27.1)                         | 1.050 (0.688-1.603) | 0.822    | 0.822         |
| AA                         | 5 (2.9)                             | 7 (3.5)                         | 1.317 (0.393-4.412)  | 0.655    | 0.811         | 5 (2.0)                               | 11 (4.2)                          | 3.020 (0.977-9.339) | 0.055    | 0.108         |
| Dominant (GG vs. GA + AA)  |                                     |                                 | 0.984 (0.624-1.552)  | 0.946    | 0.972         |                                       |                                   | 1.171 (0.780-1.759) | 0.447    | 0.48          |
| Recessive (GG + GA vs. AA) |                                     |                                 | 1.109 (0.334-3.688)  | 0.866    | 0.876         |                                       |                                   | 2.828 (0.927-8.630) | 0.068    | 0.172         |
| HWE- <i>P</i>              | 0.952                               | 0.531                           |                      |          |               | 0.703                                 | 0.245                             |                     |          |               |
| <i>VEGF</i> +1725G>A       |                                     |                                 |                      |          |               |                                       |                                   |                     |          |               |
| GG                         | 150 (87.2)                          | 175 (87.1)                      | 1.000 (reference)    |          |               | 227 (90.8)                            | 228 (87.0)                        | 1.000 (reference)   |          |               |
| GA                         | 22 (12.8)                           | 26 (12.9)                       | 1.011 (0.537-1.904)  | 0.972    | 0.972         | 23 (9.2)                              | 31 (11.8)                         | 1.391 (0.765-2.529) | 0.2      | 0.392         |
| AA                         | 0 (0.0)                             | 0 (0.0)                         | N/A                  | N/A      | N/A           | 0 (0.0)                               | 3 (1.1)                           | N/A                 | N/A      | N/A           |
| Dominant (GG vs. GA + AA)  |                                     |                                 | 1.011 (0.537-1.904)  | 0.972    | 0.972         |                                       |                                   | 1.532 (0.850-2.760) | 0.156    | 0.312         |
| Recessive (GG + GA vs. AA) |                                     |                                 | N/A                  | N/A      | N/A           |                                       |                                   | N/A                 | N/A      | N/A           |
| HWE- <i>P</i>              | 0.370                               | 0.327                           |                      |          |               | 0.446                                 | 0.111                             |                     |          |               |

CAD, coronary artery disease; COR, crude odds ratio; CI, confidence interval; AOR, adjusted odds ratio. AOR: Adjusted by age, gender, hypertension, diabetes mellitus, hyperlipidemia, and smoking status.

Table S4. Haplotype analysis of *VEGF* polymorphisms in CAD patients and control subjects.

| Haplotype                              | Control subjects<br>(2n=844) | CAD patients<br>(2n=926) | OR (95% CI)         | P       |
|----------------------------------------|------------------------------|--------------------------|---------------------|---------|
| <i>VEGF</i> -1154G>A/-1498T>C/+936C>T  |                              |                          |                     |         |
| G-T-C                                  | 509 (60.3)                   | 607 (65.6)               | 1.000 (reference)   |         |
| A-T-C                                  | 24 (2.8)                     | 2 (0.2)                  | 0.070 (0.016-0.297) | <0.0001 |
| A-T-T                                  | 6 (0.7)                      | 0 (0.0)                  | 0.065 (0.004-1.149) | 0.009   |
| <i>VEGF</i> -1154G>A/-1498T>C/+1451C>T |                              |                          |                     |         |
| G-T-C                                  | 512 (60.7)                   | 608 (65.6)               | 1.000 (reference)   |         |
| A-T-C                                  | 27 (3.2)                     | 2 (0.2)                  | 0.062 (0.015-0.264) | <0.0001 |
| <i>VEGF</i> -1154G>A/-1498T>C/+1612G>A |                              |                          |                     |         |
| G-T-G                                  | 500 (59.2)                   | 571 (61.7)               | 1.000 (reference)   |         |
| A-T-G                                  | 29 (3.4)                     | 1 (0.2)                  | 0.030 (0.004-0.223) | <0.0001 |
| <i>VEGF</i> -1154G>A/-1498T>C/+1725G>A |                              |                          |                     |         |
| G-T-G                                  | 577 (68.3)                   | 652 (70.4)               | 1.000 (reference)   |         |
| A-T-G                                  | 30 (3.5)                     | 1 (0.1)                  | 0.030 (0.004-0.217) | <0.0001 |
| <i>VEGF</i> -1154G>A/+936C>T/+1451C>T  |                              |                          |                     |         |
| G-C-C                                  | 572 (67.8)                   | 657 (70.9)               | 1.000 (reference)   |         |
| A-T-C                                  | 6 (0.7)                      | 0 (0.0)                  | 0.067 (0.004-1.192) | 0.010   |
| <i>VEGF</i> -1498T>C/+936C>T/+1451C>T  |                              |                          |                     |         |
| T-C-C                                  | 526 (62.4)                   | 607 (65.6)               | 1.000 (reference)   |         |
| T-T-C                                  | 13 (1.5)                     | 3 (0.4)                  | 0.200 (0.057-0.706) | 0.006   |
| <i>VEGF</i> -1498T>C/+936C>T/+1725G>A  |                              |                          |                     |         |
| T-C-G                                  | 504 (59.7)                   | 551 (59.5)               | 1.000 (reference)   |         |
| T-C-A                                  | 29 (3.4)                     | 58 (6.3)                 | 1.829 (1.153-2.904) | 0.010   |
| <i>VEGF</i> -1498T>C/+1451C>T/+1725G>A |                              |                          |                     |         |
| T-C-G                                  | 507 (60.1)                   | 551 (59.5)               | 1.000 (reference)   |         |
| T-C-A                                  | 32 (3.8)                     | 58 (6.3)                 | 1.668 (1.065-2.611) | 0.024   |
| <i>VEGF</i> -1498T>C/+1612G>A/+1725G>A |                              |                          |                     |         |
| T-G-G                                  | 531 (62.9)                   | 572 (61.8)               | 1.000 (reference)   |         |
| T-A-A                                  | 33 (4.0)                     | 59 (6.3)                 | 1.660 (1.067-2.583) | 0.024   |
| <i>VEGF</i> +936C>T/+1451C>T/+1612G>A  |                              |                          |                     |         |
| C-C-G                                  | 536 (63.5)                   | 599 (64.7)               | 1.000 (reference)   |         |
| C-T-G                                  | 9 (1.1)                      | 1 (0.2)                  | 0.099 (0.013-0.788) | 0.009   |
| T-C-G                                  | 15 (1.8)                     | 4 (0.4)                  | 0.239 (0.079-0.724) | 0.006   |
| <i>VEGF</i> +936C>T/+1451C>T/+1725G>A  |                              |                          |                     |         |
| C-C-G                                  | 626 (74.2)                   | 695 (75.0)               | 1.000 (reference)   |         |
| C-T-G                                  | 9 (1.0)                      | 1 (0.1)                  | 0.100 (0.013-0.793) | 0.009   |
| T-C-G                                  | 15 (1.8)                     | 6 (0.7)                  | 0.360 (0.139-0.935) | 0.029   |
| <i>VEGF</i> -1154G>A/-1498T>C          |                              |                          |                     |         |
| G-T                                    | 610 (72.3)                   | 707 (76.3)               | 1.000 (reference)   |         |
| A-T                                    | 30 (3.5)                     | 2 (0.2)                  | 0.058 (0.014-0.242) | <0.0001 |
| <i>VEGF</i> -1498T>C/+1725G>A          |                              |                          |                     |         |
| T-G                                    | 607 (71.9)                   | 650 (70.2)               | 1.000 (reference)   |         |
| T-A                                    | 33 (3.9)                     | 59 (6.3)                 | 1.670 (1.075-2.593) | 0.021   |
| <i>VEGF</i> +936C>T/+1451C>T           |                              |                          |                     |         |
| C-C                                    | 669 (79.3)                   | 757 (81.8)               | 1.000 (reference)   |         |
| C-T                                    | 9 (1.1)                      | 2 (0.2)                  | 0.196 (0.042-0.913) | 0.021   |
| T-C                                    | 16 (1.9)                     | 6 (0.7)                  | 0.331 (0.129-0.852) | 0.016   |

Note: CAD, coronary artery disease; OR, odd ratio; CI, confidence interval.

Table S5. Genotype combination of VEGF polymorphisms in CAD patients and control subjects.

| Genotype combination | Control subjects<br>(n=422) | CAD patients<br>(n=463) | AOR (95% CI)         | <i>P</i> |
|----------------------|-----------------------------|-------------------------|----------------------|----------|
| GG/TT/CC             | 154 (36.5)                  | 192 (45.5)              |                      |          |
| GG/TT/CT             | 64 (15.2)                   | 70 (16.6)               | 0.828 (0.545-1.260)  | 0.378    |
| GG/TT/TT             | 5 (1.2)                     | 2 (0.5)                 | 0.322 (0.054-1.934)  | 0.215    |
| GG/TC/CC             | 36 (8.5)                    | 39 (9.2)                | 0.827 (0.484-1.413)  | 0.486    |
| GG/TC/CT             | 22 (5.2)                    | 28 (6.6)                | 1.134 (0.594-2.166)  | 0.704    |
| GG/TC/TT             | 2 (0.5)                     | 7 (1.7)                 | 3.757 (0.736-19.169) | 0.111    |
| GG/CC/CC             | 5 (1.2)                     | 1 (0.2)                 | 0.161 (0.016-1.591)  | 0.118    |
| GG/CC/CT             | 5 (1.2)                     | 0 (0.0)                 | N/A                  | N/A      |
| GG/CC/TT             | 1 (0.2)                     | 0 (0.0)                 | N/A                  | N/A      |
| GA/TT/CC             | 12 (2.8)                    | 3 (0.7)                 | 0.224 (0.059-0.845)  | 0.027    |
| GA/TT/CT             | 5 (1.2)                     | 0 (0.0)                 | N/A                  | N/A      |
| GA/TC/CC             | 57 (13.5)                   | 68 (16.1)               | 0.907 (0.590-1.395)  | 0.658    |
| GA/TC/CT             | 25 (5.9)                    | 32 (7.6)                | 0.843 (0.461-1.541)  | 0.579    |
| GA/TC/TT             | 7 (1.7)                     | 4 (0.9)                 | 0.230 (0.054-0.988)  | 0.048    |
| GA/CC/CC             | 6 (1.4)                     | 4 (0.9)                 | 0.446 (0.113-1.760)  | 0.249    |
| GA/CC/CT             | 5 (1.2)                     | 4 (0.9)                 | 0.533 (0.132-2.158)  | 0.378    |
| GA/CC/TT             | 1 (0.2)                     | 0 (0.0)                 | N/A                  | N/A      |
| AA/TT/CT             | 1 (0.2)                     | 0 (0.0)                 | N/A                  | N/A      |
| AA/TC/CC             | 2 (0.5)                     | 0 (0.0)                 | N/A                  | N/A      |
| AA/TC/CT             | 4 (0.9)                     | 0 (0.0)                 | N/A                  | N/A      |
| AA/CC/CC             | 1 (0.2)                     | 4 (0.9)                 | 2.639 (0.261-26.674) | 0.411    |
| AA/CC/CT             | 1 (0.2)                     | 3 (0.7)                 | 2.989 (0.292-30.571) | 0.356    |
| AA/CC/TT             | 1 (0.2)                     | 2 (0.5)                 | 2.075 (0.165-26.177) | 0.572    |

Note: CAD, coronary artery disease; AOR, adjusted odd ratio; CI, confidence interval.

AOR; adjusted by age, gender, hypertension, diabetes mellitus, hyperlipidemia, and smoking

Table S6. Genotype combination of *VEGF* polymorphisms in CAD patients and controls subjects.

| Genotype combination          | Control subjects<br>(n=422) | CAD patients<br>(n=463) | AOR (95% CI)          | P     |
|-------------------------------|-----------------------------|-------------------------|-----------------------|-------|
| <i>VEGF</i> -1154G>A/-1498T>C |                             |                         |                       |       |
| GG/TT                         | 222 (52.6)                  | 265 (57.2)              | 1.000 (reference)     |       |
| GG/TC                         | 61 (14.5)                   | 73 (15.8)               | 0.839 (0.558-1.261)   | 0.399 |
| GG/CC                         | 10 (2.4)                    | 2 (0.4)                 | 0.143 (0.030-0.689)   | 0.015 |
| GA/TT                         | 18 (4.3)                    | 2 (0.4)                 | 0.067 (0.014-0.315)   | 0.001 |
| GA/TC                         | 91 (21.6)                   | 102 (22.0)              | 0.930 (0.656-1.318)   | 0.682 |
| GA/CC                         | 12 (2.8)                    | 8 (1.7)                 | 0.645 (0.245-1.697)   | 0.374 |
| AA/TT                         | 1 (0.2)                     | 0 (0.0)                 | N/A                   | 0.998 |
| AA/TC                         | 6 (1.4)                     | 0 (0.0)                 | N/A                   | 0.997 |
| AA/CC                         | 1 (0.2)                     | 11 (2.4)                | 7.753 (0.944-63.705)  | 0.057 |
| <i>VEGF</i> -1154G>A/+1612G>A |                             |                         |                       |       |
| GG/GG                         | 199 (47.2)                  | 237 (51.2)              | 1.000 (reference)     |       |
| GG/GA                         | 86 (20.4)                   | 87 (18.8)               | 0.795 (0.550-1.149)   | 0.222 |
| GG/AA                         | 8 (1.9)                     | 16 (3.5)                | 1.826 (0.749-4.452)   | 0.185 |
| GA/GG                         | 91 (21.6)                   | 74 (16.0)               | 0.673 (0.463-0.978)   | 0.038 |
| GA/GA                         | 28 (6.6)                    | 36 (7.8)                | 1.096 (0.637-1.886)   | 0.740 |
| GA/AA                         | 2 (0.5)                     | 2 (0.4)                 | 1.034 (0.137-7.818)   | 0.974 |
| AA/GG                         | 8 (1.9)                     | 9 (1.9)                 | 0.776 (0.275-2.185)   | 0.630 |
| AA/GA                         | 0 (0.0)                     | 2 (0.4)                 | N/A                   | 0.998 |
| AA/AA                         | 0 (0.0)                     | 0 (0.0)                 | N/A                   | N/A   |
| <i>VEGF</i> +936C>T/+1451C>T  |                             |                         |                       |       |
| CC/CC                         | 268 (63.5)                  | 309 (66.7)              | 1.000 (reference)     |       |
| CC/CT                         | 4 (0.9)                     | 2 (0.4)                 | 0.326 (0.052-2.068)   | 0.234 |
| CC/TT                         | 1 (0.2)                     | 0 (0.0)                 | N/A                   | 0.998 |
| CT/CC                         | 14 (3.3)                    | 6 (1.3)                 | 0.342 (0.125-0.940)   | 0.038 |
| CT/CT                         | 115 (27.3)                  | 131 (28.3)              | 0.913 (0.668-1.247)   | 0.567 |
| CT/TT                         | 3 (0.7)                     | 0 (0.0)                 | N/A                   | 0.998 |
| TT/CC                         | 1 (0.2)                     | 0 (0.0)                 | N/A                   | 0.998 |
| TT/CT                         | 0 (0.0)                     | 0 (0.0)                 | N/A                   | N/A   |
| TT/TT                         | 16 (3.8)                    | 15 (3.2)                | 0.730 (0.336-1.585)   | 0.426 |
| <i>VEGF</i> +1612G>A/+1725G>A |                             |                         |                       |       |
| GG/GG                         | 298 (70.6)                  | 320 (69.1)              | 1.000 (reference)     |       |
| GG/GA                         | 0 (0.0)                     | 0 (0.0)                 | N/A                   | N/A   |
| GG/AA                         | 0 (0.0)                     | 0 (0.0)                 | N/A                   | N/A   |
| GA/GG                         | 70 (16.6)                   | 79 (17.1)               | 1.008 (0.695-1.463)   | 0.967 |
| GA/GA                         | 44 (10.4)                   | 46 (9.9)                | 0.946 (0.597-1.497)   | 0.812 |
| GA/AA                         | 0 (0.0)                     | 0 (0.0)                 | N/A                   | N/A   |
| AA/GG                         | 9 (2.1)                     | 4 (0.9)                 | 0.444 (0.131-1.507)   | 0.193 |
| AA/GA                         | 1 (0.2)                     | 11 (2.4)                | 12.061 (1.523-95.491) | 0.018 |
| AA/AA                         | 0 (0.0)                     | 3 (0.6)                 | N/A                   | N/A   |

Note: CAD, coronary artery disease; AOR, adjusted odd ratio; CI, confidence interval.

AOR; adjusted by age, gender, hypertension, diabetes mellitus, hyperlipidemia, and smoking.

Table S7. Combinatorial effects of *VEGF* genotypes with individual clinical factors for CAD.

| Variables               | <i>VEGF</i> -1154GG |          | <i>VEGF</i> -1154 GA+AA |          | <i>VEGF</i> -1498 TT |          | <i>VEGF</i> -1498 TC+CC |          | <i>VEGF</i> +936 CC |          | <i>VEGF</i> +936 CT+TT |          |
|-------------------------|---------------------|----------|-------------------------|----------|----------------------|----------|-------------------------|----------|---------------------|----------|------------------------|----------|
|                         | AOR (95% CI)        | <i>P</i> | AOR (95% CI)            | <i>P</i> | AOR (95% CI)         | <i>P</i> | AOR (95% CI)            | <i>P</i> | AOR (95% CI)        | <i>P</i> | AOR (95% CI)           | <i>P</i> |
| HTN                     |                     |          |                         |          |                      |          |                         |          |                     |          |                        |          |
| No                      | 1.000 (Reference)   |          | 0.783 (0.513-1.193)     | 0.255    | 1.000 (Reference)    |          | 0.924 (0.629-1.356)     | 0.685    | 1.000 (Reference)   |          | 0.851 (0.565-1.281)    | 0.439    |
| Yes                     | 1.841 (1.309-2.589) | 0.0004   | 1.645 (1.055-2.564)     | 0.028    | 2.067 (1.409-3.032)  | 0.0002   | 1.731 (1.154-2.597)     | 0.008    | 2.011 (1.417-2.853) | 0.0001   | 1.539 (1.012-2.340)    | 0.044    |
| DM                      |                     |          |                         |          |                      |          |                         |          |                     |          |                        |          |
| No                      | 1.000 (Reference)   |          | 0.809 (0.579-1.131)     | 0.215    | 1.000 (Reference)    |          | 0.939 (0.689-1.281)     | 0.692    | 1.000 (Reference)   |          | 0.864 (0.624-1.195)    | 0.377    |
| Yes                     | 2.311 (1.513-3.531) | 0.0001   | 2.214 (1.127-4.350)     | 0.021    | 2.620 (1.590-4.317)  | 0.0002   | 2.113 (1.257-3.553)     | 0.005    | 2.553 (1.600-4.075) | 0.0001   | 1.841 (1.063-3.188)    | 0.030    |
| Hemoglobin A1c (%)      |                     |          |                         |          |                      |          |                         |          |                     |          |                        |          |
| <6.5                    | 1.000 (Reference)   |          | 0.800 (0.573-1.118)     | 0.192    | 1.000 (Reference)    |          | 0.964 (0.709-1.310)     | 0.813    | 1.000 (Reference)   |          | 0.839 (0.609-1.157)    | 0.285    |
| ≥6.5                    | 4.388 (2.443-7.881) | <0.0001  | 4.738 (2.094-10.722)    | 0.0002   | 5.388 (2.715-10.692) | <0.0001  | 4.514 (2.208-9.230)     | <0.0001  | 4.677 (2.502-8.742) | <0.0001  | 3.051 (1.463-6.361)    | 0.003    |
| Smoking status          |                     |          |                         |          |                      |          |                         |          |                     |          |                        |          |
| No                      | 1.000 (Reference)   |          | 0.781 (0.538-1.134)     | 0.194    | 1.000 (Reference)    |          | 1.018 (0.722-1.436)     | 0.920    | 1.000 (Reference)   |          | 0.745 (0.519-1.070)    | 0.111    |
| Yes                     | 0.844 (0.557-1.278) | 0.423    | 0.878 (0.510-1.513)     | 0.640    | 0.941 (0.592-1.495)  | 0.796    | 0.752 (0.460-1.230)     | 0.256    | 0.985 (0.646-1.503) | 0.946    | 0.989 (0.590-1.660)    | 0.967    |
| BMI                     |                     |          |                         |          |                      |          |                         |          |                     |          |                        |          |
| <25                     | 1.000 (Reference)   |          | 0.917 (0.628-1.341)     | 0.656    | 1.000 (Reference)    |          | 1.157 (0.818-1.637)     | 0.411    | 1.000 (Reference)   |          | 1.172 (0.817-1.680)    | 0.388    |
| ≥25                     | 3.022 (2.117-4.314) | <0.0001  | 2.092 (1.270-3.448)     | 0.004    | 3.486 (2.335-5.204)  | <0.0001  | 2.255 (1.437-3.541)     | 0.0004   | 3.586 (2.454-5.242) | <0.0001  | 1.974 (1.232-3.163)    | 0.005    |
| Hyperlipidemia          |                     |          |                         |          |                      |          |                         |          |                     |          |                        |          |
| No                      | 1.000 (Reference)   |          | 0.730 (0.512-1.041)     | 0.082    | 1.000 (Reference)    |          | 0.780 (0.564-1.079)     | 0.134    | 1.000 (Reference)   |          | 0.743 (0.529-1.042)    | 0.085    |
| Yes                     | 1.153 (0.792-1.679) | 0.457    | 1.455 (0.838-2.528)     | 0.183    | 1.052 (0.691-1.600)  | 0.815    | 1.548 (0.950-2.523)     | 0.080    | 1.136 (0.769-1.678) | 0.523    | 1.308 (0.774-2.210)    | 0.315    |
| LDL-cholesterol (mg/dL) |                     |          |                         |          |                      |          |                         |          |                     |          |                        |          |
| <130                    | 1.000 (Reference)   |          | 0.743 (0.521-1.060)     | 0.101    | 1.000 (Reference)    |          | 0.868 (0.626-1.204)     | 0.397    | 1.000 (Reference)   |          | 0.799 (0.569-1.124)    | 0.197    |
| ≥130                    | 3.217 (1.918-5.394) | <0.0001  | 10.204 (4.205-24.764)   | <0.0001  | 5.257 (2.718-10.168) | <0.0001  | 4.049 (2.130-7.697)     | <0.0001  | 4.238 (2.405-7.469) | <0.0001  | 5.427 (2.578-11.424)   | <0.0001  |
| MetS                    |                     |          |                         |          |                      |          |                         |          |                     |          |                        |          |
| No                      | 1.000 (Reference)   |          | 1.034 (0.670-1.596)     | 0.880    | 1.000 (Reference)    |          | 1.041 (0.695-1.559)     | 0.846    | 1.000 (Reference)   |          | 1.064 (0.698-1.620)    | 0.774    |
| Yes                     | 2.764 (1.932-3.954) | <0.0001  | 1.816 (1.125-2.933)     | 0.015    | 2.674 (1.796-3.981)  | <0.0001  | 2.290 (1.462-3.585)     | 0.0003   | 2.988 (2.050-4.356) | <0.0001  | 1.973 (1.240-3.141)    | 0.004    |
| Folate (nmol/L)         |                     |          |                         |          |                      |          |                         |          |                     |          |                        |          |
| ≥4.0                    | 1.000 (Reference)   |          | 0.854 (0.615-1.185)     | 0.344    | 1.000 (Reference)    |          | 0.945 (0.699-1.279)     | 0.715    | 1.000 (Reference)   |          | 0.868 (0.633-1.189)    | 0.377    |
| <4.0                    | 2.158 (1.322-3.522) | 0.002    | 1.861 (0.867-3.995)     | 0.111    | 2.139 (1.227-3.727)  | 0.007    | 1.911 (1.014-3.602)     | 0.045    | 2.491 (1.488-4.172) | 0.001    | 1.605 (0.799-3.223)    | 0.184    |
| Homocysteine (μmol/L)   |                     |          |                         |          |                      |          |                         |          |                     |          |                        |          |
| <12.9                   | 1.000 (Reference)   |          | 0.889 (0.638-1.239)     | 0.486    | 1.000 (Reference)    |          | 0.971 (0.716-1.317)     | 0.848    | 1.000 (Reference)   |          | 0.772 (0.563-1.059)    | 0.109    |
| ≥12.9                   | 1.531 (0.955-2.453) | 0.077    | 0.900 (0.469-1.725)     | 0.751    | 1.506 (0.880-2.576)  | 0.135    | 1.023 (0.579-1.808)     | 0.938    | 1.157 (0.727-1.841) | 0.540    | 1.576 (0.764-3.255)    | 0.219    |

CAD, coronary artery disease; AOR, adjusted odds ratio; 95% CI, 95% confidence interval, HTN, hypertension; DM, diabetes mellitus; BMI body mass index; LDL, low density lipoprotein; MetS, metabolic syndrome.

The adjusted odds ratio on the basis of risk factors, such as age, gender, hypertension, and diabetes mellitus, smoking, hyperlipidemia.

†Folate 4.0 nmol/L and homocysteine 12.9 μmol/L are lower than the 15% cut-off for each level in CAD patients and control subjects.

Table S7. Continued

| Variables               | <i>VEGF</i> +1451 CC |          |  | <i>VEGF</i> +1451 CT+TT |          |  | <i>VEGF</i> +1612 GG |          |  | <i>VEGF</i> +1612 GA+AA |          |  | <i>VEGF</i> 1725 GG |          |  | <i>VEGF</i> 1725 GA+AA |          |  |
|-------------------------|----------------------|----------|--|-------------------------|----------|--|----------------------|----------|--|-------------------------|----------|--|---------------------|----------|--|------------------------|----------|--|
|                         | AOR (95% CI)         | <i>P</i> |  | AOR (95% CI)            | <i>P</i> |  | AOR (95% CI)         | <i>P</i> |  | AOR (95% CI)            | <i>P</i> |  | AOR (95% CI)        | <i>P</i> |  | AOR (95% CI)           | <i>P</i> |  |
| HTN                     |                      |          |  |                         |          |  |                      |          |  |                         |          |  |                     |          |  |                        |          |  |
| No                      | 1.000 (Reference)    |          |  | 0.923 (0.612-1.392)     | 0.702    |  | 1.000 (Reference)    |          |  | 1.312 (0.869-1.980)     | 0.196    |  | 1.000 (Reference)   |          |  | 1.480 (0.832-2.632)    | 0.182    |  |
| Yes                     | 1.996 (1.412-2.820)  | 0.0001   |  | 1.617 (1.052-2.485)     | 0.028    |  | 2.267 (1.602-3.206)  | <0.0001  |  | 1.756 (1.136-2.715)     | 0.011    |  | 2.034 (1.499-2.759) | <0.0001  |  | 1.911 (1.017-3.591)    | 0.044    |  |
| DM                      |                      |          |  |                         |          |  |                      |          |  |                         |          |  |                     |          |  |                        |          |  |
| No                      | 1.000 (Reference)    |          |  | 0.950 (0.684-1.320)     | 0.761    |  | 1.000 (Reference)    |          |  | 0.848 (0.606-1.186)     | 0.336    |  | 1.000 (Reference)   |          |  | 0.991 (0.615-1.600)    | 0.972    |  |
| Yes                     | 2.679 (1.683-4.265)  | <0.0001  |  | 1.846 (1.063-3.205)     | 0.030    |  | 1.698 (1.102-2.614)  | 0.016    |  | 4.434 (2.203-8.925)     | <0.0001  |  | 2.054 (1.397-3.019) | 0.0002   |  | 8.068 (2.346-27.744)   | 0.001    |  |
| Hemoglobin A1c (%)      |                      |          |  |                         |          |  |                      |          |  |                         |          |  |                     |          |  |                        |          |  |
| <6.5                    | 1.000 (Reference)    |          |  | 0.871 (0.628-1.206)     | 0.405    |  | 1.000 (Reference)    |          |  | 0.920 (0.659-1.284)     | 0.624    |  | 1.000 (Reference)   |          |  | 1.061 (0.653-1.724)    | 0.811    |  |
| ≥6.5                    | 4.044 (2.186-7.481)  | <0.0001  |  | 3.453 (1.607-7.423)     | 0.002    |  | 4.479 (2.483-8.080)  | <0.0001  |  | 7.182 (3.116-16.556)    | <0.0001  |  | 4.479 (2.660-7.543) | <0.0001  |  | 7.099 (2.269-22.212)   | 0.001    |  |
| Smoking status          |                      |          |  |                         |          |  |                      |          |  |                         |          |  |                     |          |  |                        |          |  |
| No                      | 1.000 (Reference)    |          |  | 0.750 (0.522-1.078)     | 0.121    |  | 1.000 (Reference)    |          |  | 0.995 (0.686-1.444)     | 0.981    |  | 1.000 (Reference)   |          |  | 1.291 (0.749-2.223)    | 0.358    |  |
| Yes                     | 0.907 (0.602-1.367)  | 0.640    |  | 1.217 (0.704-2.102)     | 0.482    |  | 0.860 (0.567-1.306)  | 0.480    |  | 0.962 (0.571-1.620)     | 0.883    |  | 0.917 (0.636-1.321) | 0.641    |  | 1.189 (0.580-2.436)    | 0.637    |  |
| BMI                     |                      |          |  |                         |          |  |                      |          |  |                         |          |  |                     |          |  |                        |          |  |
| <25                     | 1.000 (Reference)    |          |  | 1.254 (0.872-1.804)     | 0.222    |  | 1.000 (Reference)    |          |  | 0.943 (0.645-1.377)     | 0.760    |  | 1.000 (Reference)   |          |  | 1.210 (0.704-2.080)    | 0.489    |  |
| ≥25                     | 3.530 (2.431-5.127)  | <0.0001  |  | 2.136 (1.322-3.453)     | 0.002    |  | 2.579 (1.804-3.687)  | <0.0001  |  | 3.135 (1.915-5.133)     | <0.0001  |  | 2.797 (2.029-3.855) | <0.0001  |  | 3.340 (1.650-6.761)    | 0.001    |  |
| Hyperlipidemia          |                      |          |  |                         |          |  |                      |          |  |                         |          |  |                     |          |  |                        |          |  |
| No                      | 1.000 (Reference)    |          |  | 0.789 (0.561-1.111)     | 0.175    |  | 1.000 (Reference)    |          |  | 0.999 (0.701-1.423)     | 0.994    |  | 1.000 (Reference)   |          |  | 1.150 (0.698-1.895)    | 0.584    |  |
| Yes                     | 1.147 (0.781-1.683)  | 0.485    |  | 1.436 (0.833-2.477)     | 0.193    |  | 1.312 (0.888-1.938)  | 0.173    |  | 1.513 (0.912-2.509)     | 0.109    |  | 1.312 (0.935-1.841) | 0.116    |  | 1.990 (0.877-4.513)    | 0.100    |  |
| LDL-cholesterol (mg/dL) |                      |          |  |                         |          |  |                      |          |  |                         |          |  |                     |          |  |                        |          |  |
| <130                    | 1.000 (Reference)    |          |  | 0.846 (0.600-1.191)     | 0.337    |  | 1.000 (Reference)    |          |  | 1.065 (0.748-1.516)     | 0.727    |  | 1.000 (Reference)   |          |  | 1.231 (0.747-2.029)    | 0.414    |  |
| ≥130                    | 3.916 (2.269-6.758)  | <0.0001  |  | 7.427 (3.299-16.718)    | <0.0001  |  | 3.637 (2.145-6.169)  | <0.0001  |  | 8.278 (3.640-18.827)    | <0.0001  |  | 3.858 (2.402-6.196) | <0.0001  |  | 10.962 (3.633-33.078)  | <0.0001  |  |
| MetS                    |                      |          |  |                         |          |  |                      |          |  |                         |          |  |                     |          |  |                        |          |  |
| No                      | 1.000 (Reference)    |          |  | 1.084 (0.709-1.658)     | 0.709    |  | 1.000 (Reference)    |          |  | 0.863 (0.557-1.330)     | 0.510    |  | 1.000 (Reference)   |          |  | 1.118 (0.595-2.102)    | 0.729    |  |
| Yes                     | 2.781 (1.921-4.026)  | <0.0001  |  | 2.327 (1.443-3.751)     | 0.001    |  | 2.216 (1.541-3.188)  | <0.0001  |  | 2.539 (1.566-4.119)     | 0.0002   |  | 2.482 (1.791-3.439) | <0.0001  |  | 2.538 (1.315-4.896)    | 0.006    |  |
| Folate (nmol/L)         |                      |          |  |                         |          |  |                      |          |  |                         |          |  |                     |          |  |                        |          |  |
| ≥4.0                    | 1.000 (Reference)    |          |  | 0.927 (0.674-1.275)     | 0.642    |  | 1.000 (Reference)    |          |  | 0.950 (0.686-1.316)     | 0.758    |  | 1.000 (Reference)   |          |  | 1.209 (0.763-1.916)    | 0.418    |  |
| <4.0                    | 2.492 (1.506-4.125)  | 0.0004   |  | 1.758 (0.842-3.670)     | 0.133    |  | 1.680 (1.026-2.750)  | 0.039    |  | 3.062 (1.423-6.590)     | 0.004    |  | 2.010 (1.294-3.122) | 0.002    |  | 3.204 (0.960-10.698)   | 0.058    |  |
| Homocysteine (μmol/L)   |                      |          |  |                         |          |  |                      |          |  |                         |          |  |                     |          |  |                        |          |  |
| <12.9                   | 1.000 (Reference)    |          |  | 0.850 (0.618-1.169)     | 0.317    |  | 1.000 (Reference)    |          |  | 1.071 (0.770-1.489)     | 0.683    |  | 1.000 (Reference)   |          |  | 1.170 (0.729-1.876)    | 0.515    |  |
| ≥12.9                   | 1.252 (0.789-1.988)  | 0.340    |  | 1.486 (0.715-3.086)     | 0.289    |  | 1.302 (0.811-2.088)  | 0.274    |  | 1.167 (0.621-2.193)     | 0.632    |  | 1.198 (0.786-1.826) | 0.401    |  | 1.809 (0.705-4.642)    | 0.218    |  |

CAD, coronary artery disease; AOR, adjusted odds ratio; 95% CI, 95% confidence interval, HTN, hypertension; DM, diabetes mellitus; BMI body mass index; LDL, low density lipoprotein; MetS, metabolic syndrome.

The adjusted odds ratio on the basis of risk factors, such as age, gender, hypertension, and diabetes mellitus, smoking, hyperlipidemia.

†Folate 4.0 nmol/L and homocysteine 12.9 μmol/L are lower than the 15% cut-off for each level in CAD patients and control subjects.



Table S8. Clinical variables in CAD patients and control subjects stratified by *VEGF* polymorphisms status by ANOVA

| Genotypes            | BMI<br>(kg/m <sup>2</sup> ) | Total<br>Cholesterol<br>(mg/dL) | Triglyceride<br>(mg/dL) | HDL-<br>Cholesterol<br>(mg/dL) | LDL-<br>Cholesterol<br>(mg/dL) | FBS (mg/dL)    | Hemoglobin<br>A1c (%) | SBP<br>(mmHg)  | DBP<br>(mmHg) | Folate<br>(mg/mL) | Vitamin B12<br>(pg/mL) | Homocysteine<br>(mmol/L) | Creatinine<br>(mg/dL) |
|----------------------|-----------------------------|---------------------------------|-------------------------|--------------------------------|--------------------------------|----------------|-----------------------|----------------|---------------|-------------------|------------------------|--------------------------|-----------------------|
|                      | Mean ± SD                   | Mean ± SD                       | Mean ± SD               | Mean ± SD                      | Mean ± SD                      | Mean ± SD      | Mean ± SD             | Mean ± SD      | Mean ± SD     | Mean ± SD         | Mean ± SD              | Mean ± SD                | Mean ± SD             |
| <i>VEGF</i> -1154G>A |                             |                                 |                         |                                |                                |                |                       |                |               |                   |                        |                          |                       |
| GG                   | 24.74 ± 3.42                | 189.91 ± 42.42                  | 154.75 ± 105.82         | 44.81 ± 12.58                  | 115.01 ± 41.90                 | 130.11 ± 54.50 | 6.59 ± 2.79           | 129.57 ± 19.78 | 79.14 ± 12.30 | 8.57 ± 7.55       | 675.99 ± 282.74        | 9.82 ± 4.88              | 1.34 ± 5.71           |
| GA                   | 23.90 ± 3.42                | 181.47 ± 37.33                  | 131.82 ± 61.12          | 43.30 ± 10.91                  | 114.31 ± 30.62                 | 114.59 ± 53.70 | 6.44 ± 2.11           | 133.00 ± 21.54 | 83.00 ± 9.95  | 7.14 ± 3.94       | 498.56 ± 122.62        | 10.28 ± 4.32             | 0.94 ± 0.26           |
| AA                   | 24.85 ± 3.20                | 188.16 ± 43.84                  | 148.82 ± 88.26          | 44.63 ± 10.61                  | 112.09 ± 37.55                 | 124.75 ± 52.62 | 6.36 ± 1.44           | 129.97 ± 19.28 | 80.49 ± 12.66 | 8.89 ± 11.03      | 682.81 ± 274.69        | 9.91 ± 4.59              | 1.05 ± 0.64           |
| <i>P</i>             | 0.587                       | 0.651                           | 0.515                   | 0.898                          | 0.737                          | 0.252          | 0.671                 | 0.752          | 0.179         | 0.678             | 0.157                  | 0.906                    | 0.719                 |
| <i>VEGF</i> -1498T>C |                             |                                 |                         |                                |                                |                |                       |                |               |                   |                        |                          |                       |
| TT                   | 24.72 ± 3.56                | 189.86 ± 43.44                  | 151.85 ± 90.55          | 44.62 ± 12.40                  | 113.29 ± 40.65                 | 128.46 ± 54.46 | 6.61 ± 3.05           | 129.77 ± 19.71 | 79.33 ± 12.54 | 8.60 ± 7.91       | 673.08 ± 281.51        | 9.85 ± 4.51              | 1.43 ± 6.36           |
| TC                   | 24.64 ± 2.81                | 188.30 ± 40.31                  | 133.63 ± 88.51          | 43.13 ± 10.13                  | 127.61 ± 38.89                 | 125.12 ± 65.28 | 6.43 ± 1.75           | 134.67 ± 18.88 | 82.12 ± 12.43 | 9.59 ± 7.23       | 719.81 ± 274.48        | 8.95 ± 3.22              | 0.94 ± 0.33           |
| CC                   | 24.81 ± 3.11                | 188.50 ± 41.91                  | 156.62 ± 116.05         | 45.09 ± 11.76                  | 114.12 ± 40.59                 | 128.73 ± 51.86 | 6.42 ± 1.51           | 129.08 ± 19.67 | 79.62 ± 12.08 | 8.52 ± 9.57       | 670.63 ± 277.11        | 9.98 ± 5.35              | 1.03 ± 0.55           |
| <i>P</i>             | 0.929                       | 0.894                           | 0.356                   | 0.690                          | 0.198                          | 0.920          | 0.700                 | 0.215          | 0.364         | 0.758             | 0.687                  | 0.422                    | 0.459                 |
| <i>VEGF</i> +936C>T  |                             |                                 |                         |                                |                                |                |                       |                |               |                   |                        |                          |                       |
| CC                   | 24.87 ± 3.53                | 187.85 ± 43.80                  | 151.16 ± 103.88         | 44.98 ± 12.30                  | 113.60 ± 40.02                 | 125.25 ± 50.43 | 6.36 ± 1.42           | 129.58 ± 19.92 | 79.54 ± 12.15 | 8.49 ± 7.47       | 660.77 ± 265.66        | 9.79 ± 4.69              | 1.38 ± 5.94           |
| CT                   | 24.55 ± 2.99                | 191.44 ± 40.62                  | 155.67 ± 95.67          | 43.70 ± 11.24                  | 115.50 ± 42.10                 | 134.45 ± 59.93 | 6.96 ± 4.08           | 129.55 ± 19.14 | 79.42 ± 12.79 | 8.92 ± 10.87      | 719.12 ± 309.76        | 10.05 ± 5.16             | 1.03 ± 0.65           |
| TT                   | 24.26 ± 3.10                | 197.48 ± 38.03                  | 156.97 ± 84.13          | 49.64 ± 13.57                  | 116.42 ± 40.23                 | 134.52 ± 61.18 | 6.02 ± 0.87           | 134.68 ± 19.41 | 81.61 ± 12.93 | 8.63 ± 4.61       | 548.83 ± 168.40        | 9.42 ± 3.18              | 0.96 ± 0.32           |
| <i>P</i>             | 0.405                       | 0.293                           | 0.812                   | 0.094                          | 0.845                          | 0.163          | 0.349                 | 0.365          | 0.641         | 0.800             | 0.017                  | 0.673                    | 0.584                 |
| <i>VEGF</i> +1451C>T |                             |                                 |                         |                                |                                |                |                       |                |               |                   |                        |                          |                       |
| CC                   | 24.86 ± 3.51                | 188.33 ± 43.51                  | 152.28 ± 104.49         | 44.90 ± 12.19                  | 114.14 ± 39.74                 | 126.03 ± 51.58 | 6.38 ± 1.50           | 129.39 ± 19.79 | 79.56 ± 12.10 | 8.38 ± 7.37       | 670.43 ± 276.83        | 9.80 ± 4.78              | 1.37 ± 5.87           |
| CT                   | 24.56 ± 3.04                | 190.38 ± 41.49                  | 154.17 ± 93.88          | 43.62 ± 11.38                  | 114.18 ± 42.99                 | 133.53 ± 58.56 | 6.94 ± 4.13           | 129.82 ± 19.49 | 79.29 ± 12.99 | 9.22 ± 11.24      | 704.30 ± 293.30        | 10.02 ± 5.01             | 1.03 ± 0.67           |
| TT                   | 24.19 ± 2.89                | 197.76 ± 36.16                  | 150.12 ± 83.30          | 51.22 ± 13.68                  | 117.32 ± 40.01                 | 131.50 ± 59.30 | 6.04 ± 0.90           | 135.56 ± 18.53 | 81.85 ± 12.40 | 8.59 ± 4.46       | 547.67 ± 169.08        | 9.53 ± 3.29              | 0.97 ± 0.31           |
| <i>P</i>             | 0.372                       | 0.408                           | 0.959                   | 0.029                          | 0.946                          | 0.179          | 0.215                 | 0.205          | 0.525         | 0.451             | 0.050                  | 0.776                    | 0.625                 |
| <i>VEGF</i> +1612G>A |                             |                                 |                         |                                |                                |                |                       |                |               |                   |                        |                          |                       |
| GG                   | 24.70 ± 3.27                | 188.98 ± 42.15                  | 154.37 ± 107.29         | 44.67 ± 12.37                  | 114.19 ± 40.89                 | 128.16 ± 52.69 | 6.50 ± 2.78           | 129.83 ± 18.97 | 79.45 ± 12.06 | 8.88 ± 9.52       | 667.27 ± 287.34        | 9.86 ± 4.93              | 1.35 ± 5.77           |
| GA                   | 25.03 ± 3.53                | 192.78 ± 48.31                  | 157.59 ± 101.60         | 44.71 ± 8.11                   | 102.68 ± 40.02                 | 118.11 ± 39.43 | 6.53 ± 1.29           | 128.21 ± 21.14 | 79.82 ± 14.04 | 7.68 ± 5.23       | 614.57 ± 266.13        | 10.01 ± 3.78             | 0.99 ± 0.25           |
| AA                   | 24.84 ± 3.57                | 189.66 ± 43.53                  | 147.93 ± 81.64          | 44.92 ± 11.71                  | 115.71 ± 39.89                 | 130.19 ± 58.68 | 6.59 ± 1.74           | 129.71 ± 21.30 | 79.86 ± 12.97 | 8.06 ± 5.71       | 700.74 ± 257.29        | 9.82 ± 4.54              | 1.05 ± 0.70           |
| <i>P</i>             | 0.816                       | 0.891                           | 0.685                   | 0.973                          | 0.416                          | 0.537          | 0.938                 | 0.913          | 0.903         | 0.398             | 0.358                  | 0.977                    | 0.685                 |
| <i>VEGF</i> +1725G>A |                             |                                 |                         |                                |                                |                |                       |                |               |                   |                        |                          |                       |
| GG                   | 24.72 ± 3.31                | 189.46 ± 42.92                  | 152.77 ± 102.96         | 44.79 ± 12.07                  | 114.48 ± 41.04                 | 127.63 ± 52.84 | 6.48 ± 2.56           | 129.78 ± 19.29 | 79.58 ± 12.37 | 8.70 ± 8.89       | 674.07 ± 281.16        | 9.86 ± 4.88              | 1.29 ± 5.15           |
| GA                   | 28.33 ± 4.09                | 182.67 ± 36.67                  | 152.67 ± 2.89           | 39.67 ± 1.44                   | 84.00 ± 79.88                  | 101.00 ± 15.59 | 7.37 ± 0.29           | 136.67 ± 5.77  | 80.00 ± 0.00  | 3.61 ± 1.53       | 646.00                 | 17.53 ± 1.67             | 1.10 ± 0.17           |
| AA                   | 24.87 ± 3.68                | 188.05 ± 41.35                  | 152.43 ± 83.75          | 44.54 ± 12.32                  | 113.70 ± 35.11                 | 135.19 ± 62.81 | 6.85 ± 2.04           | 129.29 ± 22.65 | 79.48 ± 12.56 | 8.16 ± 5.28       | 679.95 ± 267.98        | 9.53 ± 3.89              | 1.02 ± 0.32           |
| <i>P</i>             | 0.168                       | 0.920                           | 1.000                   | 0.757                          | 0.429                          | 0.290          | 0.475                 | 0.808          | 0.995         | 0.503             | 0.984                  | 0.017                    | 0.875                 |

CAD, coronary artery disease; BMI body mass index; HDL, high density lipoprotein; LDL, low density lipoprotein; FBS, fasting blood sugar; SBP, systolic blood pressure; DBP, diastolic blood pressure.

Table S9. Clinical variables in CAD patients stratified by *VEGF* polymorphisms status by ANOVA

| Genotypes            | BMI<br>(kg/m <sup>2</sup> ) | Total<br>Cholesterol<br>(mg/dL) | Triglyceride<br>(mg/dL) | HDL-<br>Cholesterol<br>(mg/dL) | LDL-<br>Cholesterol<br>(mg/dL) | FBS (mg/dL)    | Hemoglobin<br>A1c (%) | SBP (mmHg)     | DBP<br>(mmHg) | Folate<br>(mg/mL) | Vitamin B12<br>(pg/mL) | Homocysteine<br>(mmol/L) | Creatinine<br>(mg/dL) |
|----------------------|-----------------------------|---------------------------------|-------------------------|--------------------------------|--------------------------------|----------------|-----------------------|----------------|---------------|-------------------|------------------------|--------------------------|-----------------------|
|                      | Mean ± SD                   | Mean ± SD                       | Mean ± SD               | Mean ± SD                      | Mean ± SD                      | Mean ± SD      | Mean ± SD             | Mean ± SD      | Mean ± SD     | Mean ± SD         | Mean ± SD              | Mean ± SD                | Mean ± SD             |
| <i>VEGF</i> -1154G>A |                             |                                 |                         |                                |                                |                |                       |                |               |                   |                        |                          |                       |
| GG                   | 24.99 ± 3.78                | 186.48 ± 46.10                  | 159.45 ± 114.58         | 43.90 ± 11.31                  | 112.91 ± 40.22                 | 142.70 ± 61.91 | 6.53 ± 1.58           | 128.41 ± 21.52 | 78.81 ± 12.88 | 8.47 ± 7.44       | 659.74 ± 337.24        | 9.79 ± 5.11              | 1.69 ± 7.75           |
| GA                   | 25.05 ± 3.00                | 187.95 ± 49.47                  | 157.23 ± 91.68          | 43.87 ± 11.07                  | 113.22 ± 40.03                 | 139.61 ± 65.98 | 6.44 ± 1.40           | 127.05 ± 20.69 | 79.29 ± 12.78 | 9.31 ± 14.71      | 695.11 ± 349.57        | 10.33 ± 5.95             | 1.14 ± 0.87           |
| AA                   | 24.70 ± 3.40                | 184.50 ± 43.97                  | 146.00 ± 67.51          | 45.26 ± 10.30                  | 113.90 ± 33.61                 | 123.80 ± 69.68 | 6.79 ± 2.24           | 132.00 ± 21.50 | 82.00 ± 7.89  | 7.81 ± 4.38       | 325.00 ± ?             | 8.99 ± 3.92              | 0.98 ± 0.30           |
| <i>P</i>             | 0.956                       | 0.948                           | 0.917                   | 0.930                          | 0.995                          | 0.606          | 0.780                 | 0.715          | 0.710         | 0.722             | 0.560                  | 0.569                    | 0.555                 |
| <i>VEGF</i> -1498T>C |                             |                                 |                         |                                |                                |                |                       |                |               |                   |                        |                          |                       |
| TT                   | 25.18 ± 3.75                | 185.82 ± 47.83                  | 155.02 ± 87.39          | 43.69 ± 11.04                  | 112.01 ± 41.45                 | 142.40 ± 64.61 | 6.55 ± 1.62           | 128.13 ± 21.28 | 78.71 ± 13.02 | 8.61 ± 8.04       | 634.51 ± 329.38        | 9.91 ± 4.63              | 1.88 ± 8.73           |
| TC                   | 24.79 ± 3.42                | 188.87 ± 46.21                  | 164.31 ± 134.54         | 44.48 ± 11.65                  | 113.85 ± 38.43                 | 140.54 ± 58.46 | 6.47 ± 1.41           | 127.30 ± 21.26 | 78.85 ± 12.54 | 8.73 ± 11.92      | 713.76 ± 362.26        | 10.06 ± 6.32             | 1.08 ± 0.72           |
| CC                   | 24.35 ± 2.69                | 181.85 ± 38.83                  | 156.95 ± 111.43         | 42.18 ± 9.78                   | 119.10 ± 32.85                 | 138.68 ± 80.69 | 6.47 ± 1.83           | 136.00 ± 21.13 | 84.00 ± 10.46 | 8.55 ± 4.24       | 631.75 ± 256.34        | 8.37 ± 3.44              | 0.97 ± 0.29           |
| <i>P</i>             | 0.393                       | 0.714                           | 0.680                   | 0.600                          | 0.706                          | 0.937          | 0.903                 | 0.224          | 0.199         | 0.992             | 0.557                  | 0.418                    | 0.436                 |
| <i>VEGF</i> +936C>T  |                             |                                 |                         |                                |                                |                |                       |                |               |                   |                        |                          |                       |
| CC                   | 25.18 ± 3.88                | 185.43 ± 48.17                  | 154.61 ± 110.82         | 44.04 ± 11.54                  | 113.15 ± 41.83                 | 137.30 ± 59.48 | 6.47 ± 1.51           | 128.97 ± 22.07 | 79.41 ± 12.83 | 8.07 ± 6.33       | 609.16 ± 317.66        | 9.86 ± 5.29              | 1.74 ± 8.12           |
| CT                   | 24.60 ± 2.87                | 189.49 ± 43.64                  | 166.20 ± 103.29         | 43.20 ± 9.94                   | 112.76 ± 35.07                 | 148.41 ± 67.88 | 6.66 ± 1.68           | 125.75 ± 19.01 | 77.72 ± 12.31 | 10.03 ± 14.94     | 776.55 ± 363.13        | 10.09 ± 5.47             | 1.13 ± 0.88           |
| TT                   | 24.74 ± 3.25                | 191.07 ± 47.75                  | 173.86 ± 106.06         | 48.20 ± 14.63                  | 112.14 ± 43.11                 | 165.71 ± 79.26 | 6.21 ± 0.91           | 133.57 ± 23.73 | 82.14 ± 15.28 | 8.94 ± 5.99       | 796.00 ± 0.00          | 9.23 ± 3.93              | 1.12 ± 0.42           |
| <i>P</i>             | 0.284                       | 0.662                           | 0.508                   | 0.438                          | 0.992                          | 0.081          | 0.478                 | 0.211          | 0.281         | 0.175             | 0.080                  | 0.811                    | 0.659                 |
| <i>VEGF</i> +1451C>T |                             |                                 |                         |                                |                                |                |                       |                |               |                   |                        |                          |                       |
| CC                   | 25.19 ± 3.86                | 185.79 ± 48.13                  | 155.41 ± 112.01         | 44.10 ± 11.54                  | 113.37 ± 41.67                 | 138.28 ± 60.99 | 6.50 ± 1.58           | 129.05 ± 22.10 | 79.51 ± 12.89 | 8.04 ± 6.31       | 617.46 ± 320.29        | 9.83 ± 5.26              | 1.73 ± 8.06           |
| CT                   | 24.57 ± 2.87                | 188.75 ± 43.67                  | 164.65 ± 100.09         | 43.04 ± 9.90                   | 112.20 ± 35.28                 | 146.48 ± 65.26 | 6.60 ± 1.53           | 125.47 ± 18.81 | 77.43 ± 12.10 | 10.18 ± 15.10     | 768.96 ± 366.97        | 10.16 ± 5.55             | 1.13 ± 0.89           |
| TT                   | 24.74 ± 3.25                | 191.07 ± 47.75                  | 173.86 ± 106.06         | 48.20 ± 14.63                  | 112.14 ± 43.11                 | 165.71 ± 79.26 | 6.21 ± 0.91           | 133.57 ± 23.73 | 82.14 ± 15.28 | 8.94 ± 5.99       | 796.00 ± 0.00          | 9.23 ± 3.93              | 1.12 ± 0.42           |
| <i>P</i>             | 0.255                       | 0.784                           | 0.621                   | 0.377                          | 0.960                          | 0.159          | 0.682                 | 0.168          | 0.185         | 0.128             | 0.136                  | 0.745                    | 0.671                 |
| <i>VEGF</i> +1612G>A |                             |                                 |                         |                                |                                |                |                       |                |               |                   |                        |                          |                       |
| GG                   | 24.84 ± 3.68                | 184.90 ± 46.99                  | 161.77 ± 117.76         | 43.46 ± 10.96                  | 112.21 ± 39.91                 | 140.74 ± 60.70 | 6.44 ± 1.44           | 127.96 ± 19.83 | 78.78 ± 12.35 | 9.13 ± 10.64      | 676.42 ± 363.99        | 9.92 ± 5.65              | 1.73 ± 8.00           |
| GA                   | 25.25 ± 3.40                | 192.18 ± 47.34                  | 152.41 ± 85.22          | 45.01 ± 12.15                  | 116.44 ± 39.68                 | 146.25 ± 70.18 | 6.71 ± 1.82           | 128.48 ± 24.59 | 79.31 ± 13.61 | 7.77 ± 6.82       | 658.87 ± 291.46        | 9.79 ± 4.45              | 1.12 ± 0.94           |
| AA                   | 25.92 ± 3.28                | 183.00 ± 38.48                  | 145.94 ± 77.57          | 44.72 ± 8.71                   | 103.38 ± 43.14                 | 123.11 ± 46.04 | 6.50 ± 1.25           | 129.44 ± 22.87 | 80.56 ± 14.34 | 6.65 ± 5.77       | 514.40 ± 114.28        | 10.48 ± 4.35             | 0.98 ± 0.26           |
| <i>P</i>             | 0.307                       | 0.321                           | 0.633                   | 0.413                          | 0.384                          | 0.321          | 0.313                 | 0.941          | 0.804         | 0.291             | 0.590                  | 0.873                    | 0.647                 |
| <i>VEGF</i> +1725G>A |                             |                                 |                         |                                |                                |                |                       |                |               |                   |                        |                          |                       |
| GG                   | 24.94 ± 3.57                | 186.59 ± 47.28                  | 158.38 ± 110.71         | 43.70 ± 11.03                  | 113.21 ± 40.04                 | 141.06 ± 61.86 | 6.44 ± 1.44           | 128.18 ± 20.54 | 78.86 ± 12.65 | 8.81 ± 10.02      | 678.50 ± 355.25        | 9.92 ± 5.47              | 1.61 ± 7.14           |
| GA                   | 25.25 ± 3.68                | 188.46 ± 44.48                  | 160.54 ± 95.25          | 45.70 ± 12.60                  | 113.21 ± 37.11                 | 147.05 ± 71.53 | 7.01 ± 2.14           | 127.54 ± 26.54 | 79.89 ± 13.91 | 7.87 ± 6.04       | 580.29 ± 230.40        | 9.38 ± 3.62              | 1.04 ± 0.39           |
| AA                   | 28.23 ± 4.22                | 182.67 ± 36.67                  | 152.67 ± 2.89           | 39.67 ± 1.44                   | 84.00 ± 79.88                  | 101.00 ± 15.59 | 7.37 ± 0.29           | 136.67 ± 5.77  | 80.00 ± 0.00  | 3.61 ± 1.53       | 646.00                 | 17.53 ± 1.67             | 1.10 ± 0.17           |
| <i>P</i>             | 0.243                       | 0.950                           | 0.986                   | 0.367                          | 0.452                          | 0.430          | 0.057                 | 0.258          | 0.840         | 0.532             | 0.813                  | 0.033                    | 0.831                 |

CAD, coronary artery disease; BMI body mass index; HDL, high density lipoprotein; LDL, low density lipoprotein; FBS, fasting blood sugar; SBP, systolic blood pressure; DBP, diastolic blood pressure.

Table S10. Clinical variables in control subjects stratified by *VEGF* polymorphisms status by ANOVA

| Genotypes            | BMI<br>(kg/m <sup>2</sup> ) | Total<br>Cholesterol<br>(mg/dL) | Triglyceride<br>(mg/dL) | HDL-<br>Cholesterol<br>(mg/dL) | LDL-<br>Cholesterol<br>(mg/dL) | FBS (mg/dL)    | Hemoglobin<br>A1c (%) | SBP (mmHg)     | DBP<br>(mmHg) | Folate<br>(mg/mL) | Vitamin B12<br>(pg/mL) | Homocysteine<br>(mmol/L) | Creatinine<br>(mg/dL) |
|----------------------|-----------------------------|---------------------------------|-------------------------|--------------------------------|--------------------------------|----------------|-----------------------|----------------|---------------|-------------------|------------------------|--------------------------|-----------------------|
|                      | Mean ± SD                   | Mean ± SD                       | Mean ± SD               | Mean ± SD                      | Mean ± SD                      | Mean ± SD      | Mean ± SD             | Mean ± SD      | Mean ± SD     | Mean ± SD         | Mean ± SD              | Mean ± SD                | Mean ± SD             |
| <i>VEGF</i> -1154G>A |                             |                                 |                         |                                |                                |                |                       |                |               |                   |                        |                          |                       |
| GG                   | 24.15 ± 3.26                | 193.94 ± 37.30                  | 149.21 ± 94.35          | 47.16 ± 15.19                  | 120.37 ± 45.64                 | 115.54 ± 39.80 | 6.76 ± 4.91           | 130.92 ± 17.49 | 79.52 ± 11.60 | 8.67 ± 7.68       | 680.22 ± 267.30        | 9.85 ± 4.61              | 0.93 ± 0.22           |
| GA                   | 24.56 ± 3.47                | 188.36 ± 37.95                  | 140.83 ± 84.50          | 46.26 ± 9.46                   | 109.73 ± 32.03                 | 111.50 ± 31.74 | 6.21 ± 1.52           | 132.66 ± 17.54 | 81.60 ± 12.49 | 8.54 ± 6.68       | 680.85 ± 262.55        | 9.53 ± 2.88              | 0.98 ± 0.27           |
| AA                   | 21.93 ± 2.98                | 177.14 ± 27.91                  | 111.57 ± 48.07          | 36.77 ± 12.40                  | 115.67 ± 23.18                 | 101.43 ± 8.00  | 5.05 ± 0.07           | 134.25 ± 23.00 | 84.25 ± 12.54 | 6.30 ± 3.42       | 520.25 ± 111.10        | 11.88 ± 4.51             | 0.89 ± 0.20           |
| <i>P</i>             | 0.247                       | 0.225                           | 0.421                   | 0.418                          | 0.308                          | 0.406          | 0.676                 | 0.597          | 0.169         | 0.665             | 0.237                  | 0.287                    | 0.22                  |
| <i>VEGF</i> -1498T>C |                             |                                 |                         |                                |                                |                |                       |                |               |                   |                        |                          |                       |
| TT                   | 24.99 ± 3.01                | 193.91 ± 41.57                  | 113.35 ± 57.52          | 45.49 ± 11.29                  | 148.88 ± 46.69                 | 113.91 ± 48.21 | 6.27 ± 1.67           | 133.52 ± 17.08 | 80.48 ± 13.93 | 10.35 ± 8.85      | 735.13 ± 280.04        | 9.42 ± 3.02              | 0.92 ± 0.36           |
| TC                   | 23.95 ± 3.21                | 194.41 ± 37.51                  | 148.29 ± 94.03          | 46.93 ± 15.09                  | 116.52 ± 38.58                 | 113.11 ± 34.57 | 6.80 ± 5.50           | 131.58 ± 17.69 | 80.01 ± 11.99 | 8.59 ± 7.79       | 682.22 ± 268.92        | 9.78 ± 4.38              | 0.93 ± 0.22           |
| CC                   | 24.58 ± 3.53                | 188.09 ± 36.52                  | 147.81 ± 89.99          | 46.59 ± 11.99                  | 114.75 ± 45.44                 | 115.76 ± 39.79 | 6.30 ± 1.72           | 131.05 ± 17.59 | 80.47 ± 11.53 | 8.32 ± 6.36       | 661.05 ± 254.88        | 9.89 ± 4.06              | 0.97 ± 0.25           |
| <i>P</i>             | 0.224                       | 0.261                           | 0.206                   | 0.954                          | 0.09                           | 0.792          | 0.774                 | 0.815          | 0.924         | 0.463             | 0.416                  | 0.877                    | 0.199                 |
| <i>VEGF</i> +936C>T  |                             |                                 |                         |                                |                                |                |                       |                |               |                   |                        |                          |                       |
| CC                   | 24.16 ± 3.42                | 190.67 ± 38.00                  | 147.15 ± 95.25          | 47.33 ± 13.82                  | 114.73 ± 35.18                 | 111.79 ± 33.13 | 6.06 ± 1.09           | 130.26 ± 17.16 | 79.68 ± 11.34 | 8.92 ± 8.51       | 672.99 ± 250.93        | 9.71 ± 3.94              | 0.97 ± 0.25           |
| CT                   | 24.47 ± 3.18                | 193.50 ± 37.20                  | 144.48 ± 85.83          | 44.86 ± 13.84                  | 121.59 ± 54.50                 | 119.73 ± 46.07 | 7.71 ± 7.10           | 133.48 ± 18.54 | 81.17 ± 13.10 | 7.91 ± 4.56       | 705.80 ± 296.09        | 10.01 ± 4.85             | 0.92 ± 0.21           |
| TT                   | 23.51 ± 2.88                | 202.76 ± 28.17                  | 143.06 ± 60.63          | 53.66 ± 10.27                  | 128.40 ± 31.60                 | 108.82 ± 18.97 | 5.50 ± 0.55           | 135.59 ± 15.70 | 81.18 ± 11.11 | 8.40 ± 3.39       | 534.29 ± 161.51        | 9.58 ± 2.45              | 0.82 ± 0.10           |
| <i>P</i>             | 0.615                       | 0.379                           | 0.954                   | 0.28                           | 0.501                          | 0.475          | 0.119                 | 0.139          | 0.469         | 0.435             | 0.035                  | 0.787                    | 0.004                 |
| <i>VEGF</i> +1451C>T |                             |                                 |                         |                                |                                |                |                       |                |               |                   |                        |                          |                       |
| CC                   | 24.16 ± 3.39                | 191.21 ± 37.47                  | 148.74 ± 95.31          | 46.79 ± 13.46                  | 115.93 ± 34.85                 | 112.68 ± 34.22 | 6.10 ± 1.23           | 129.76 ± 16.88 | 79.62 ± 11.18 | 8.73 ± 8.33       | 682.91 ± 264.67        | 9.78 ± 4.20              | 0.96 ± 0.25           |
| CT                   | 24.53 ± 3.31                | 192.25 ± 38.96                  | 142.12 ± 85.05          | 45.21 ± 14.71                  | 119.36 ± 58.74                 | 118.78 ± 45.85 | 7.98 ± 7.81           | 134.67 ± 19.16 | 81.36 ± 13.67 | 8.27 ± 4.97       | 688.71 ± 272.29        | 9.87 ± 4.39              | 0.92 ± 0.22           |
| TT                   | 23.59 ± 2.43                | 202.45 ± 25.59                  | 133.50 ± 60.40          | 59.68 ± 5.04                   | 131.80 ± 28.39                 | 107.55 ± 18.52 | 5.40 ± 0.62           | 136.95 ± 14.35 | 81.65 ± 10.35 | 8.36 ± 3.28       | 535.25 ± 163.36        | 9.75 ± 2.80              | 0.87 ± 0.13           |
| <i>P</i>             | 0.553                       | 0.431                           | 0.661                   | 0.082                          | 0.658                          | 0.244          | 0.03                  | 0.014          | 0.257         | 0.842             | 0.047                  | 0.979                    | 0.119                 |
| <i>VEGF</i> +1612G>A |                             |                                 |                         |                                |                                |                |                       |                |               |                   |                        |                          |                       |
| GG                   | 24.32 ± 3.13                | 193.41 ± 35.72                  | 146.31 ± 94.12          | 47.52 ± 14.85                  | 118.91 ± 42.92                 | 114.99 ± 38.66 | 6.67 ± 4.76           | 131.84 ± 17.81 | 80.17 ± 11.72 | 8.64 ± 8.30       | 665.21 ± 267.84        | 9.80 ± 4.06              | 0.94 ± 0.24           |
| GA                   | 24.21 ± 3.75                | 186.85 ± 38.86                  | 142.93 ± 77.52          | 44.69 ± 10.62                  | 113.96 ± 40.75                 | 112.39 ± 34.97 | 6.24 ± 1.47           | 131.05 ± 16.98 | 80.46 ± 12.25 | 8.36 ± 4.30       | 709.50 ± 250.15        | 9.85 ± 4.67              | 0.96 ± 0.23           |
| AA                   | 21.74 ± 2.37                | 212.33 ± 61.59                  | 180.89 ± 140.86         | 44.70 ± 3.45                   | 99.00 ± 20.78                  | 108.11 ± 19.53 | 6.70 ± 2.12           | 126.00 ± 18.53 | 78.50 ± 14.15 | 9.74 ± 3.34       | 670.22 ± 314.33        | 9.17 ± 2.47              | 1.01 ± 0.24           |
| <i>P</i>             | 0.23                        | 0.116                           | 0.486                   | 0.547                          | 0.589                          | 0.731          | 0.87                  | 0.561          | 0.878         | 0.843             | 0.326                  | 0.888                    | 0.52                  |
| <i>VEGF</i> +1725G>A |                             |                                 |                         |                                |                                |                |                       |                |               |                   |                        |                          |                       |
| GG                   | 24.24 ± 3.29                | 192.56 ± 37.46                  | 146.71 ± 93.65          | 47.36 ± 13.93                  | 117.48 ± 43.28                 | 113.54 ± 36.41 | 6.58 ± 4.32           | 131.48 ± 17.74 | 80.36 ± 12.04 | 8.60 ± 7.63       | 673.13 ± 263.23        | 9.81 ± 4.19              | 0.94 ± 0.24           |
| GA                   | 24.20 ± 3.64                | 187.49 ± 37.07                  | 141.15 ± 63.92          | 40.67 ± 10.77                  | 115.17 ± 29.31                 | 119.38 ± 44.97 | 6.36 ± 1.66           | 131.51 ± 16.49 | 78.96 ± 10.76 | 8.50 ± 4.26       | 712.40 ± 273.74        | 9.72 ± 4.24              | 0.99 ± 0.18           |
| AA                   | 0.00 ± 0.00                 | 0.00 ± 0.00                     | 0.00 ± 0.00             | 0.00 ± 0.00                    | 0.00 ± 0.00                    | 0.00 ± 0.00    | 0.00 ± 0.00           | 0.00 ± 0.00    | 0.00 ± 0.00   | 0.00 ± 0.00       | 0.00 ± 0.00            | 0.00 ± 0.00              | 0.00 ± 0.00           |
| <i>P</i>             | 0.94                        | 0.411                           | 0.711                   | 0.056                          | 0.825                          | 0.947          | 0.846                 | 0.992          | 0.456         | 0.933             | 0.357                  | 0.898                    | 0.173                 |

BMI body mass index; HDL, high density lipoprotein; LDL, low density lipoprotein; FBS, fasting blood sugar; SBP, systolic blood pressure; DBP, diastolic blood pressure.
